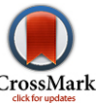

## Correction

# Correction: Sensitivity of Honeybee Hygroreceptors to Slow Humidity Changes and Temporal Humidity Variation Detected in High Resolution by Mobile Measurements

## The PLOS ONE Staff

The grant number in the funding statement is incorrect. Please refer to the correct funding statement below:

This work was supported by a grant from the Austrian Science Fund (Project P20.196-B17) ([www.fwf.ac.at](http://www.fwf.ac.at) <<http://www.fwf.ac.at>>). The funders had no role in study design, data collection and analysis, decision to publish, or preparation of the manuscript.

## Reference

1. Tichy H, Kallina W (2014) Sensitivity of Honeybee Hygroreceptors to Slow Humidity Changes and Temporal Humidity Variation Detected in High Resolution by Mobile Measurements. *PLoS ONE* 9(6): e99032. doi:10.1371/journal.pone.0099032

---

**Citation:** The PLOS ONE Staff (2014) Correction: Sensitivity of Honeybee Hygroreceptors to Slow Humidity Changes and Temporal Humidity Variation Detected in High Resolution by Mobile Measurements. *PLoS ONE* 9(8): e106878. doi:10.1371/journal.pone.0106878

**Published:** August 21, 2014

**Copyright:** © 2014 The PLOS ONE Staff. This is an open-access article distributed under the terms of the Creative Commons Attribution License, which permits unrestricted use, distribution, and reproduction in any medium, provided the original author and source are credited.
